# Supplementary material for: The modular network structure of the mutational landscape of Acute Myeloid Leukemia
Source: PubMed Central journal article supplement (PMC6179200; doi:10.1371/journal.pone.0202926), 2018-10-10
Supplement: pone.0202926.s002.pdf [file pone.0202926.s002.pdf]

**Supplementary Table S1. Clinical characteristics of patients analyzed by WES.**

| Patient               | #AML 1 | #AML 2 | #AML 3 | #AML 4 | #AML 5 | #AML 6 | #AML 7 |
|-----------------------|--------|--------|--------|--------|--------|--------|--------|
| Age at Dg             | 28     | 60     | 55     | 21     | 20     | 28     | 53     |
| Sex                   | Male   | Male   | Female | Female | Male   | Male   | Female |
| WGS consent           | yes    | yes    | yes    | yes    | yes    | yes    | yes    |
| Hemoglobin            | 9,10   | 9,30   | 7,60   | 9,10   | 13,40  | 10,50  | 10,5   |
| Leucocyte             | 2,90   | 2,60   | 0,80   | 6,00   | 3,20   | 2,10   | 1,6    |
| Platelets             | 160    | 14     | 157    | 40     | 184    | 182    | 87     |
| %BM Blast             | 71     | 53     | 14     | 94     | 76     | 79     | 57     |
| Clinical Cytogenetics | 46,XY  | 46,XY  | 46,XX  | 46,XX  | 46,XY  | 46,XY  | 46,XX  |
| FISH Cytocell*        | Normal | Normal | Normal | Normal | Normal | Normal | Normal |
| Relapse               | no     | no     | no     | no     | no     | no     | yes    |
| Expired               | no     | no     | yes    | no     | yes    | no     | yes    |
| OS (mo)               | 103    | 87     | 9      | 127    | 18     | 147    | 21     |
