# Supplementary material for: The modular network structure of the mutational landscape of Acute Myeloid Leukemia
Source: PubMed Central journal article supplement (PMC6179200; doi:10.1371/journal.pone.0202926), 2018-10-10
Supplement: pone.0202926.s003.pdf [file pone.0202926.s003.pdf]

**Supplementary Table S2. Mapping results from sequencing data.**

| Patient | Sample | Bases     | >Q20      | Reads  | Mean Read Length (pb) |
|---------|--------|-----------|-----------|--------|-----------------------|
| #AML 1  | Tumor  | 4.553.343 | 3.986.255 | 30.976 | 146                   |
| #AML 1  | Normal | 4.982.533 | 4.387.849 | 33.507 | 148                   |
| #AML 2  | Tumor  | 3.695.240 | 3.253.919 | 28.213 | 130                   |
| #AML 2  | Normal | 4.768.382 | 4.212.709 | 34.401 | 138                   |
| #AML 3  | Tumor  | 5.064.510 | 4.438.856 | 34.046 | 148                   |
| #AML 3  | Normal | 4.558.711 | 4.015.547 | 33.518 | 136                   |
| #AML 4  | Tumor  | 5.455.915 | 4.781.959 | 37.135 | 146                   |
| #AML 4  | Normal | 4.631.925 | 4.071.348 | 31.100 | 148                   |
| #AML 5  | Tumor  | 4.849.858 | 4.280.860 | 32.608 | 148                   |
| #AML 5  | Normal | 4.910.242 | 4.347.146 | 34.938 | 140                   |
| #AML 6  | Tumor  | 5.319.895 | 4.707.803 | 35.834 | 148                   |
| #AML 6  | Normal | 4.667.911 | 4.092.747 | 32.154 | 145                   |
| #AML 7  | Tumor  | 4.997.126 | 4.409.818 | 32.786 | 152                   |
| #AML 7  | Normal | 4.424.748 | 3.906.619 | 29.993 | 147                   |
