# Supplementary material for: The modular network structure of the mutational landscape of Acute Myeloid Leukemia
Source: PubMed Central journal article supplement (PMC6179200; doi:10.1371/journal.pone.0202926), 2018-10-10
Supplement: pone.0202926.s004.pdf [file pone.0202926.s004.pdf]

Supplementary Tabala S3. All mutations detected in the study cohort using genome GRCh37/hg19 as a reference.

| Patient ID | Sample | Chrom | Start Position | End Position | Gene ID* | Type | Zygosity | Genotype | Ref | Variant | Coverage | Ref Cov | Var Cov | *Gen previously reported at TCG |
|------------|--------|-------|----------------|--------------|----------|------|----------|----------|-----|---------|----------|---------|---------|---------------------------------|
| #AML 1     | Tumor  | chr1  | 111783982      | 111783982    | CHI3L2   | SNP  | Het      | C/A      | C   | A       | 219      | 110     | 109     | No                              |
| #AML 1     | Normal | chr1  | 111783982      | 111783982    | CHI3L2   | SNP  | Het      | C/A      | C   | A       | 245      | 131     | 114     | No                              |
| #AML 1     | Tumor  | chr1  | 111783996      | 111783996    | CHI3L2   | SNP  | Hom      | G/G      | A   | G       | 221      | 0       | 221     | No                              |
| #AML 1     | Normal | chr1  | 111783996      | 111783996    | CHI3L2   | SNP  | Hom      | G/G      | A   | G       | 251      | 0       | 251     | No                              |
| #AML 1     | Tumor  | chr12 | 112696301      | 112696301    | IGF1     | SNP  | Het      | T/C      | T   | C       | 267      | 177     | 90      | No                              |
| #AML 1     | Tumor  | chr16 | 87445363       | 87445363     | ZCCHC14  | SNP  | Hom      | A/A      | G   | A       | 176      | 2       | 174     | No                              |
| #AML 1     | Normal | chr16 | 87445363       | 87445363     | ZCCHC14  | SNP  | Hom      | A/A      | G   | A       | 174      | 2       | 172     | No                              |
| #AML 1     | Tumor  | chr19 | 20003109       | 20003109     | ZNF253   | SNP  | Het      | A/G      | A   | G       | 185      | 84      | 101     | No                              |
| #AML 1     | Normal | chr19 | 20003109       | 20003109     | ZNF253   | SNP  | Het      | A/G      | A   | G       | 196      | 99      | 97      | No                              |
| #AML 1     | Tumor  | chr20 | 50092027       | 50092027     | NFATC2   | SNP  | Hom      | G/G      | T   | G       | 200      | 0       | 200     | No                              |
| #AML 1     | Normal | chr20 | 50092027       | 50092027     | NFATC2   | SNP  | Hom      | G/G      | T   | G       | 188      | 0       | 188     | No                              |
| #AML 1     | Tumor  | chr21 | 39817525       | 39817525     | ERG      | SNP  | Het      | C/T      | C   | T       | 444      | 272     | 172     | No                              |
| #AML 1     | Tumor  | chr3  | 4185026        | 4185026      | SUMF1    | SNP  | Het      | G/A      | G   | A       | 252      | 138     | 114     | No                              |
| #AML 1     | Normal | chr3  | 4185026        | 4185026      | SUMF1    | SNP  | Het      | G/A      | G   | A       | 237      | 44      | 193     | No                              |
| #AML 1     | Tumor  | chr5  | 67588982       | 67588982     | PIK3R1   | SNP  | Het      | G/T      | G   | T       | 294      | 195     | 99      | No                              |
| #AML 1     | Normal | chr5  | 140229845      | 140229845    | PCDHA7   | SNP  | Het      | G/A      | G   | A       | 45       | 43      | 2       | No                              |
| #AML 1     | Tumor  | chr8  | 52733050       | 52733050     | PCMTD1   | SNP  | Hom      | A/A      | T   | A       | 121      | 2       | 119     | No                              |
| #AML 1     | Normal | chr8  | 52733050       | 52733050     | PCMTD1   | SNP  | Hom      | A/A      | T   | A       | 160      | 0       | 160     | No                              |
| #AML 1     | Tumor  | chr9  | 139617578      | 139617578    | FAM69B   | SNP  | Het      | G/A      | G   | A       | 63       | 61      | 2       | No                              |
| #AML 1     | Tumor  | chr9  | 139617626      | 139617626    | FAM69B   | SNP  | Het      | G/A      | G   | A       | 62       | 26      | 36      | No                              |
| #AML 1     | Normal | chr9  | 139617626      | 139617626    | FAM69B   | SNP  | Het      | G/A      | G   | A       | 63       | 53      | 10      | No                              |
| #AML 1     | Tumor  | chr9  | 139617634      | 139617634    | FAM69B   | SNP  | Het      | C/T      | C   | T       | 61       | 42      | 19      | No                              |
| #AML 1     | Tumor  | chr9  | 139617662      | 139617662    | FAM69B   | SNP  | Hom      | C/C      | T   | C       | 36       | 0       | 36      | No                              |
| #AML 1     | Normal | chr9  | 139617662      | 139617662    | FAM69B   | SNP  | Het      | T/C      | T   | C       | 63       | 49      | 14      | No                              |
| #AML 1     | Normal | chrX  | 48559098       | 48559098     | SUV39H1  | SNP  | Het      | T/G      | T   | G       | 52       | 50      | 2       | No                              |
| #AML 1     | Tumor  | chrX  | 153660206      | 153660206    | ATP6AP1  | SNP  | Het      | G/C      | G   | C       | 137      | 29      | 108     | No                              |
| #AML 2     | Tumor  | chr1  | 111783996      | 111783996    | CHI3L2   | SNP  | Hom      | G/G      | A   | G       | 258      | 0       | 258     | No                              |
| #AML 2     | Normal | chr1  | 111783996      | 111783996    | CHI3L2   | SNP  | Hom      | G/G      | A   | G       | 340      | 0       | 340     | No                              |
| #AML 2     | Tumor  | chr11 | 55890103       | 55890103     | OR8H3    | SNP  | Het      | C/T      | C   | T       | 26       | 15      | 11      | No                              |
| #AML 2     | Normal | chr11 | 55890103       | 55890103     | OR8H3    | SNP  | Het      | C/T      | C   | T       | 67       | 52      | 15      | No                              |
| #AML 2     | Normal | chr11 | 60906279       | 60906279     | VPS37C   | SNP  | Het      | G/T      | G   | T       | 267      | 204     | 63      | No                              |
| #AML 2     | Tumor  | chr11 | 60906320       | 60906320     | VPS37C   | SNP  | Het      | T/C      | T   | C       | 90       | 39      | 51      | No                              |
| #AML 2     | Normal | chr11 | 60906320       | 60906320     | VPS37C   | SNP  | Het      | T/C      | T   | C       | 261      | 198     | 63      | No                              |
| #AML 2     | Tumor  | chr12 | 11214360       | 11214360     | PRH1     | SNP  | Het      | C/A      | C   | A       | 205      | 180     | 25      | No                              |
| #AML 2     | Normal | chr12 | 11214360       | 11214360     | PRH1     | SNP  | Het      | C/T      | C   | T       | 236      | 136     | 100     | No                              |
| #AML 2     | Tumor  | chr12 | 11214363       | 11214363     | PRH1     | SNP  | Het      | T/C      | T   | C       | 207      | 181     | 26      | No                              |
| #AML 2     | Normal | chr12 | 11214363       | 11214363     | PRH1     | SNP  | Het      | T/C      | T   | C       | 314      | 269     | 45      | No                              |
| #AML 2     | Tumor  | chr12 | 11214368       | 11214368     | PRH1     | SNP  | Het      | T/C      | T   | C       | 225      | 183     | 42      | No                              |
| #AML 2     | Normal | chr12 | 11214368       | 11214368     | PRH1     | SNP  | Het      | T/C      | T   | C       | 332      | 271     | 61      | No                              |
| #AML 2     | Tumor  | chr12 | 11214386       | 11214386     | PRH1     | SNP  | Het      | T/G      | T   | G       | 223      | 182     | 41      | No                              |
| #AML 2     | Normal | chr12 | 11214386       | 11214386     | PRH1     | SNP  | Het      | T/G      | T   | G       | 332      | 270     | 62      | No                              |
| #AML 2     | Tumor  | chr12 | 11214392       | 11214392     | PRH1     | SNP  | Het      | G/A      | G   | A       | 224      | 182     | 42      | No                              |
| #AML 2     | Normal | chr12 | 11214392       | 11214392     | PRH1     | SNP  | Het      | G/A      | G   | A       | 331      | 269     | 62      | No                              |
| #AML 2     | Tumor  | chr12 | 11214437       | 11214437     | PRH1     | SNP  | Het      | T/C      | T   | C       | 223      | 181     | 42      | No                              |
| #AML 2     | Normal | chr12 | 11214437       | 11214437     | PRH1     | SNP  | Het      | T/C      | T   | C       | 331      | 268     | 63      | No                              |
| #AML 2     | Tumor  | chr12 | 11214455       | 11214455     | PRH1     | SNP  | Het      | T/C      | T   | C       | 224      | 182     | 42      | No                              |
| #AML 2     | Normal | chr12 | 11214455       | 11214455     | PRH1     | SNP  | Het      | T/C      | T   | C       | 332      | 270     | 62      | No                              |
| #AML 2     | Tumor  | chr12 | 11214472       | 11214472     | PRH1     | SNP  | Het      | A/G      | A   | G       | 220      | 178     | 42      | No                              |
| #AML 2     | Normal | chr12 | 11214472       | 11214472     | PRH1     | SNP  | Het      | A/G      | A   | G       | 324      | 259     | 65      | No                              |
| #AML 2     | Tumor  | chr12 | 11214495       | 11214495     | PRH1     | SNP  | Het      | T/C      | T   | C       | 201      | 168     | 33      | No                              |
| #AML 2     | Normal | chr12 | 11214495       | 11214495     | PRH1     | SNP  | Het      | T/C      | T   | C       | 296      | 238     | 58      | No                              |
| #AML 2     | Tumor  | chr16 | 50666209       | 50666209     | NKD1     | SNP  | Het      | G/A      | G   | A       | 167      | 153     | 14      | No                              |
| #AML 2     | Tumor  | chr16 | 87445363       | 87445363     | ZCCHC14  | SNP  | Het      | G/A      | G   | A       | 61       | 33      | 28      | No                              |
| #AML 2     | Normal | chr16 | 87445363       | 87445363     | ZCCHC14  | SNP  | Het      | G/A      | G   | A       | 74       | 29      | 45      | No                              |
| #AML 2     | Tumor  | chr16 | 87445422       | 87445422     | ZCCHC14  | SNP  | Het      | T/C      | T   | C       | 59       | 57      | 2       | No                              |
| #AML 2     | Tumor  | chr17 | 76967674       | 76967674     | LGALS3BP | SNP  | Het      | G/C      | G   | C       | 39       | 26      | 13      | No                              |
| #AML 2     | Tumor  | chr19 | 20003109       | 20003109     | ZNF253   | SNP  | Het      | A/G      | A   | G       | 95       | 47      | 48      | No                              |
| #AML 2     | Normal | chr19 | 20003109       | 20003109     | ZNF253   | SNP  | Het      | A/G      | A   | G       | 190      | 96      | 94      | No                              |
| #AML 2     | Tumor  | chr20 | 50092027       | 50092027     | NFATC2   | SNP  | Het      | T/G      | T   | G       | 86       | 51      | 35      | No                              |
| #AML 2     | Normal | chr20 | 50092027       | 50092027     | NFATC2   | SNP  | Het      | T/G      | T   | G       | 144      | 112     | 32      | No                              |
| #AML 2     | Tumor  | chr22 | 19028735       | 19028735     | DGCR2    | SNP  | Het      | G/A      | G   | A       | 125      | 71      | 54      | No                              |
| #AML 2     | Tumor  | chr3  | 4185026        | 4185026      | SUMF1    | SNP  | Het      | G/A      | G   | A       | 175      | 84      | 91      | No                              |
| #AML 2     | Normal | chr3  | 4185026        | 4185026      | SUMF1    | SNP  | Het      | G/A      | G   | A       | 304      | 146     | 158     | No                              |
| #AML 2     | Tumor  | chr3  | 119334879      | 119334879    | PLA1A    | SNP  | Het      | G/A      | G   | A       | 157      | 103     | 54      | No                              |
| #AML 2     | Normal | chr8  | 52733050       | 52733050     | PCMTD1   | SNP  | Het      | T/A      | T   | A       | 83       | 46      | 37      | No                              |
| #AML 2     | Tumor  | chr9  | 139617626      | 139617626    | FAM69B   | SNP  | Het      | G/A      | G   | A       | 17       | 8       | 9       | No                              |
| #AML 2     | Normal | chr9  | 139617626      | 139617626    | FAM69B   | SNP  | Het      | G/A      | G   | A       | 44       | 36      | 8       | No                              |
| #AML 2     | Tumor  | chr9  | 139617662      | 139617662    | FAM69B   | SNP  | Hom      | C/C      | T   | C       | 12       | 0       | 12      | No                              |
| #AML 2     | Normal | chr9  | 139617662      | 139617662    | FAM69B   | SNP  | Het      | T/C      | T   | C       | 42       | 13      | 29      | No                              |
| #AML 3     | Tumor  | chr1  | 89449434       | 89449434     | CCBL2    | SNP  | Het      | T/C      | T   | C       | 394      | 379     | 15      | No                              |
| #AML 3     | Tumor  | chr1  | 111783980      | 111783980    | CHI3L2   | SNP  | Het      | C/T      | C   | T       | 185      | 114     | 71      | No                              |
| #AML 3     | Tumor  | chr1  | 111783982      | 111783982    | CHI3L2   | SNP  | Het      | C/A      | C   | A       | 183      | 102     | 81      | No                              |
| #AML 3     | Normal | chr1  | 111783982      | 111783982    | CHI3L2   | SNP  | Het      | C/A      | C   | A       | 89       | 42      | 47      | No                              |
| #AML 3     | Tumor  | chr1  | 111783996      | 111783996    | CHI3L2   | SNP  | Hom      | G/G      | A   | G       | 186      | 2       | 184     | No                              |
| #AML 3     | Normal | chr1  | 111783996      | 111783996    | CHI3L2   | SNP  | Hom      | G/G      | A   | G       | 92       | 1       | 91      | No                              |
| #AML 3     | Tumor  | chr1  | 231342500      | 231342500    | TRIM67   | SNP  | Het      | C/T      | C   | T       | 508      | 346     | 162     | No                              |
| #AML 3     | Normal | chr11 | 55890103       | 55890103     | OR8H3    | SNP  | Het      | C/T      | C   | T       | 12       | 7       | 5       | No                              |
| #AML 3     | Tumor  | chr12 | 11214368       | 11214368     | PRH1     | SNP  | Het      | T/C      | T   | C       | 199      | 175     | 24      | No                              |
| #AML 3     | Normal | chr12 | 11214368       | 11214368     | PRH1     | SNP  | Het      | T/C      | T   | C       | 115      | 98      | 17      | No                              |
| #AML 3     | Tumor  | chr12 | 11214386       | 11214386     | PRH1     | SNP  | Het      | T/G      | T   | G       | 202      | 178     | 24      | No                              |
| #AML 3     | Normal | chr12 | 11214386       | 11214386     | PRH1     | SNP  | Het      | T/G      | T   | G       | 115      | 98      | 17      | No                              |
| #AML 3     | Tumor  | chr12 | 11214392       | 11214392     | PRH1     | SNP  | Het      | G/A      | G   | A       | 202      | 178     | 24      | No                              |
| #AML 3     | Normal | chr12 | 11214392       | 11214392     | PRH1     | SNP  | Het      | G/A      | G   | A       | 116      | 99      | 17      | No                              |
| #AML 3     | Tumor  | chr12 | 11214437       | 11214437     | PRH1     | SNP  | Het      | T/C      | T   | C       | 197      | 174     | 23      | No                              |
| #AML 3     | Normal | chr12 | 11214437       | 11214437     | PRH1     | SNP  | Het      | T/C      | T   | C       | 114      | 98      | 16      | No                              |
| #AML 3     | Tumor  | chr12 | 11214455       | 11214455     | PRH1     | SNP  | Het      | T/C      | T   | C       | 190      | 165     | 25      | No                              |
| #AML 3     | Normal | chr12 | 11214455       | 11214455     | PRH1     | SNP  | Het      | T/C      | T   | C       | 114      | 97      | 17      | No                              |
| #AML 3     | Tumor  | chr12 | 11214472       | 11214472     | PRH1     | SNP  | Het      | A/G      | A   | G       | 184      | 158     | 26      | No                              |
| #AML 3     | Normal | chr12 | 11214472       | 11214472     | PRH1     | SNP  | Het      | A/G      | A   | G       | 112      | 95      | 17      | No                              |
| #AML 3     | Tumor  | chr12 | 11214495       | 11214495     | PRH1     | SNP  | Het      | T/C      | T   | C       | 168      | 147     | 21      | No                              |
| #AML 3     | Normal | chr12 | 11214495       | 11214495     | PRH1     | SNP  | Het      | T/C      | T   | C       | 100      | 88      | 12      | No                              |
| #AML 3     | Normal | chr15 | 31851177       | 31851177     | OTUD7A   | SNP  | Het      | T/C      | T   | C       | 117      | 113     | 4       | No                              |
| #AML 3     | Tumor  | chr16 | 87445363       | 87445363     | ZCCHC14  | SNP  | Hom      | A/A      | G   | A       | 200      | 3       | 197     | No                              |
| #AML 3     | Normal | chr16 | 87445363       | 87445363     | ZCCHC14  | SNP  | Hom      | A/A      | G   | A       | 149      | 0       | 149     | No                              |
| #AML 3     | Tumor  | chr19 | 20003042       | 20003042     | ZNF253   | SNP  | Het      | T/C      | T   | C       | 165      | 105     | 60      | No                              |
| #AML 3     | Tumor  | chr19 | 20003109       | 20003109     | ZNF253   | SNP  | Het      | A/G      | A   | G       | 159      | 79      | 80      | No                              |

|        |        |       |           |           |         |     |     |     |   |   |     |     |     |    |
|--------|--------|-------|-----------|-----------|---------|-----|-----|-----|---|---|-----|-----|-----|----|
| #AML 3 | Normal | chr19 | 20003109  | 20003109  | ZNF253  | SNP | Het | A/G | A | G | 76  | 46  | 30  | No |
| #AML 3 | Tumor  | chr3  | 134920337 | 134920337 | EPHB1   | SNP | Het | G/A | G | A | 258 | 172 | 86  | No |
| #AML 3 | Tumor  | chr8  | 52733050  | 52733050  | PCMTD1  | SNP | Het | T/A | T | A | 142 | 68  | 74  | No |
| #AML 3 | Normal | chr8  | 52733050  | 52733050  | PCMTD1  | SNP | Het | T/A | T | A | 117 | 62  | 55  | No |
| #AML 3 | Tumor  | chr9  | 139617662 | 139617662 | FAM69B  | SNP | Het | T/C | T | C | 65  | 41  | 24  | No |
| #AML 3 | Normal | chr9  | 139617662 | 139617662 | FAM69B  | SNP | Het | T/C | T | C | 60  | 35  | 25  | No |
| #AML 3 | Normal | chr9  | 139617665 | 139617665 | FAM69B  | SNP | Het | A/G | A | G | 61  | 59  | 2   | No |
| #AML 4 | Tumor  | chr1  | 111783982 | 111783982 | CHI3L2  | SNP | Hom | A/A | C | A | 283 | 0   | 283 | No |
| #AML 4 | Normal | chr1  | 111783982 | 111783982 | CHI3L2  | SNP | Hom | A/A | C | A | 290 | 0   | 290 | No |
| #AML 4 | Normal | chr1  | 111783983 | 111783983 | CHI3L2  | SNP | Het | G/A | G | A | 305 | 291 | 14  | No |
| #AML 4 | Tumor  | chr1  | 111783996 | 111783996 | CHI3L2  | SNP | Hom | G/G | A | G | 295 | 0   | 295 | No |
| #AML 4 | Normal | chr1  | 111783996 | 111783996 | CHI3L2  | SNP | Hom | G/G | A | G | 307 | 0   | 307 | No |
| #AML 4 | Normal | chr11 | 55890013  | 55890013  | OR8H3   | SNP | Het | G/A | G | A | 42  | 40  | 2   | No |
| #AML 4 | Tumor  | chr11 | 55890132  | 55890132  | OR8H3   | SNP | Het | C/T | C | T | 21  | 11  | 10  | No |
| #AML 4 | Tumor  | chr12 | 11214360  | 11214360  | PRH1    | SNP | Het | C/T | C | T | 170 | 115 | 55  | No |
| #AML 4 | Normal | chr12 | 11214360  | 11214360  | PRH1    | SNP | Het | C/T | C | T | 212 | 144 | 68  | No |
| #AML 4 | Tumor  | chr12 | 102811603 | 102811603 | IGF1    | SNP | Het | C/T | C | T | 70  | 61  | 9   | No |
| #AML 4 | Tumor  | chr16 | 87445363  | 87445363  | ZCCHC14 | SNP | Hom | A/A | G | A | 221 | 0   | 221 | No |
| #AML 4 | Normal | chr16 | 87445363  | 87445363  | ZCCHC14 | SNP | Hom | A/A | G | A | 141 | 0   | 141 | No |
| #AML 4 | Tumor  | chr19 | 20003109  | 20003109  | ZNF253  | SNP | Het | A/G | A | G | 188 | 85  | 103 | No |
| #AML 4 | Normal | chr19 | 20003109  | 20003109  | ZNF253  | SNP | Het | A/G | A | G | 270 | 141 | 129 | No |
| #AML 4 | Tumor  | chr19 | 44660819  | 44660819  | ZNF234  | SNP | Het | C/T | C | T | 335 | 278 | 57  | No |
| #AML 4 | Tumor  | chr3  | 4185026   | 4185026   | SUMF1   | SNP | Het | G/A | G | A | 308 | 169 | 139 | No |
| #AML 4 | Normal | chr3  | 4185026   | 4185026   | SUMF1   | SNP | Het | G/A | G | A | 318 | 165 | 153 | No |
| #AML 4 | Tumor  | chr5  | 140215305 | 140215305 | PCDHA7  | SNP | Het | C/T | C | T | 214 | 118 | 96  | No |
| #AML 4 | Tumor  | chr8  | 52733050  | 52733050  | PCMTD1  | SNP | Hom | A/A | T | A | 183 | 3   | 180 | No |
| #AML 4 | Normal | chr8  | 52733050  | 52733050  | PCMTD1  | SNP | Hom | A/A | T | A | 119 | 0   | 119 | No |
| #AML 4 | Normal | chrX  | 111698613 | 111698613 | ZCCHC16 | SNP | Het | T/C | T | C | 474 | 225 | 249 | No |
| #AML 5 | Tumor  | chr1  | 111783982 | 111783982 | CHI3L2  | SNP | Het | C/A | C | A | 323 | 169 | 154 | No |
| #AML 5 | Normal | chr1  | 111783982 | 111783982 | CHI3L2  | SNP | Het | C/A | C | A | 369 | 196 | 173 | No |
| #AML 5 | Tumor  | chr1  | 111783996 | 111783996 | CHI3L2  | SNP | Hom | G/G | A | G | 334 | 0   | 334 | No |
| #AML 5 | Normal | chr11 | 55890022  | 55890022  | OR8H3   | SNP | Het | T/C | T | C | 46  | 44  | 2   | No |
| #AML 5 | Tumor  | chr12 | 11214360  | 11214360  | PRH1    | SNP | Het | C/A | C | A | 364 | 299 | 65  | No |
| #AML 5 | Normal | chr12 | 11214360  | 11214360  | PRH1    | SNP | Het | C/A | C | A | 433 | 350 | 83  | No |
| #AML 5 | Tumor  | chr12 | 11214363  | 11214363  | PRH1    | SNP | Het | T/C | T | C | 365 | 300 | 65  | No |
| #AML 5 | Normal | chr12 | 11214363  | 11214363  | PRH1    | SNP | Het | T/C | T | C | 433 | 350 | 83  | No |
| #AML 5 | Tumor  | chr12 | 11214368  | 11214368  | PRH1    | SNP | Het | T/C | T | C | 404 | 301 | 103 | No |
| #AML 5 | Normal | chr12 | 11214368  | 11214368  | PRH1    | SNP | Het | T/C | T | C | 462 | 347 | 115 | No |
| #AML 5 | Tumor  | chr12 | 11214386  | 11214386  | PRH1    | SNP | Het | T/G | T | G | 407 | 303 | 104 | No |
| #AML 5 | Normal | chr12 | 11214386  | 11214386  | PRH1    | SNP | Het | T/G | T | G | 462 | 350 | 112 | No |
| #AML 5 | Tumor  | chr12 | 11214392  | 11214392  | PRH1    | SNP | Het | G/A | G | A | 408 | 303 | 105 | No |
| #AML 5 | Normal | chr12 | 11214392  | 11214392  | PRH1    | SNP | Het | G/A | G | A | 465 | 352 | 113 | No |
| #AML 5 | Tumor  | chr12 | 11214437  | 11214437  | PRH1    | SNP | Het | T/C | T | C | 400 | 298 | 102 | No |
| #AML 5 | Normal | chr12 | 11214437  | 11214437  | PRH1    | SNP | Het | T/C | T | C | 455 | 343 | 112 | No |
| #AML 5 | Tumor  | chr12 | 11214455  | 11214455  | PRH1    | SNP | Het | T/C | T | C | 403 | 298 | 105 | No |
| #AML 5 | Normal | chr12 | 11214455  | 11214455  | PRH1    | SNP | Het | T/C | T | C | 453 | 341 | 112 | No |
| #AML 5 | Tumor  | chr12 | 11214472  | 11214472  | PRH1    | SNP | Het | A/G | A | G | 397 | 295 | 102 | No |
| #AML 5 | Normal | chr12 | 11214472  | 11214472  | PRH1    | SNP | Het | A/G | A | G | 443 | 330 | 113 | No |
| #AML 5 | Tumor  | chr12 | 11214495  | 11214495  | PRH1    | SNP | Het | T/C | T | C | 359 | 269 | 90  | No |
| #AML 5 | Normal | chr12 | 11214495  | 11214495  | PRH1    | SNP | Het | T/C | T | C | 391 | 297 | 94  | No |
| #AML 5 | Tumor  | chr16 | 70843739  | 70843739  | HYDIN   | SNP | Het | T/G | T | G | 202 | 59  | 143 | No |
| #AML 5 | Normal | chr16 | 87445352  | 87445352  | ZCCHC14 | SNP | Het | C/T | C | T | 60  | 58  | 2   | No |
| #AML 5 | Tumor  | chr19 | 44660791  | 44660791  | ZNF234  | SNP | Het | G/A | G | A | 404 | 176 | 228 | No |
| #AML 5 | Normal | chr19 | 44660791  | 44660791  | ZNF234  | SNP | Het | G/A | G | A | 498 | 259 | 239 | No |
| #AML 5 | Tumor  | chr20 | 50092027  | 50092027  | NFATC2  | SNP | Hom | G/G | T | G | 124 | 0   | 124 | No |
| #AML 5 | Normal | chr20 | 50092027  | 50092027  | NFATC2  | SNP | Hom | G/G | T | G | 80  | 0   | 80  | No |
| #AML 5 | Tumor  | chr8  | 52733050  | 52733050  | PCMTD1  | SNP | Het | T/A | T | A | 113 | 52  | 61  | No |
| #AML 5 | Normal | chr8  | 52733050  | 52733050  | PCMTD1  | SNP | Het | T/A | T | A | 72  | 33  | 39  | No |
| #AML 6 | Tumor  | chr1  | 89449399  | 89449399  | CCBL2   | SNP | Het | T/C | T | C | 598 | 577 | 21  | No |
| #AML 6 | Tumor  | chr1  | 89449434  | 89449434  | CCBL2   | SNP | Het | T/C | T | C | 601 | 577 | 24  | No |
| #AML 6 | Tumor  | chr1  | 89449483  | 89449483  | CCBL2   | SNP | Het | C/G | C | G | 593 | 572 | 21  | No |
| #AML 6 | Tumor  | chr1  | 111783982 | 111783982 | CHI3L2  | SNP | Het | C/A | C | A | 357 | 184 | 173 | No |
| #AML 6 | Normal | chr1  | 111783982 | 111783982 | CHI3L2  | SNP | Het | C/A | C | A | 343 | 163 | 180 | No |
| #AML 6 | Tumor  | chr1  | 111783996 | 111783996 | CHI3L2  | SNP | Hom | G/G | A | G | 365 | 0   | 365 | No |
| #AML 6 | Normal | chr1  | 111783996 | 111783996 | CHI3L2  | SNP | Hom | G/G | A | G | 354 | 0   | 354 | No |
| #AML 6 | Tumor  | chr11 | 55890160  | 55890160  | OR8H3   | SNP | Het | T/C | T | C | 61  | 58  | 3   | No |
| #AML 6 | Tumor  | chr12 | 11214360  | 11214360  | PRH1    | SNP | Het | C/A | C | A | 386 | 345 | 41  | No |
| #AML 6 | Normal | chr12 | 11214360  | 11214360  | PRH1    | SNP | Het | C/A | C | A | 303 | 262 | 41  | No |
| #AML 6 | Tumor  | chr12 | 11214363  | 11214363  | PRH1    | SNP | Het | T/C | T | C | 386 | 347 | 39  | No |
| #AML 6 | Normal | chr12 | 11214363  | 11214363  | PRH1    | SNP | Het | T/C | T | C | 304 | 263 | 41  | No |
| #AML 6 | Tumor  | chr12 | 11214368  | 11214368  | PRH1    | SNP | Het | T/C | T | C | 408 | 345 | 63  | No |
| #AML 6 | Normal | chr12 | 11214368  | 11214368  | PRH1    | SNP | Het | T/C | T | C | 322 | 262 | 60  | No |
| #AML 6 | Tumor  | chr12 | 11214386  | 11214386  | PRH1    | SNP | Het | T/G | T | G | 414 | 354 | 60  | No |
| #AML 6 | Normal | chr12 | 11214386  | 11214386  | PRH1    | SNP | Het | T/G | T | G | 330 | 269 | 61  | No |
| #AML 6 | Tumor  | chr12 | 11214392  | 11214392  | PRH1    | SNP | Het | G/A | G | A | 414 | 352 | 62  | No |
| #AML 6 | Normal | chr12 | 11214392  | 11214392  | PRH1    | SNP | Het | G/A | G | A | 332 | 271 | 61  | No |
| #AML 6 | Tumor  | chr12 | 11214437  | 11214437  | PRH1    | SNP | Het | T/C | T | C | 408 | 345 | 63  | No |
| #AML 6 | Normal | chr12 | 11214437  | 11214437  | PRH1    | SNP | Het | T/C | T | C | 328 | 267 | 61  | No |
| #AML 6 | Tumor  | chr12 | 11214455  | 11214455  | PRH1    | SNP | Het | T/C | T | C | 405 | 342 | 63  | No |
| #AML 6 | Normal | chr12 | 11214455  | 11214455  | PRH1    | SNP | Het | T/C | T | C | 325 | 264 | 61  | No |
| #AML 6 | Tumor  | chr12 | 11214472  | 11214472  | PRH1    | SNP | Het | A/G | A | G | 396 | 335 | 61  | No |
| #AML 6 | Normal | chr12 | 11214472  | 11214472  | PRH1    | SNP | Het | A/G | A | G | 315 | 253 | 62  | No |
| #AML 6 | Tumor  | chr12 | 11214495  | 11214495  | PRH1    | SNP | Het | T/C | T | C | 348 | 294 | 54  | No |
| #AML 6 | Normal | chr12 | 11214495  | 11214495  | PRH1    | SNP | Het | T/C | T | C | 275 | 226 | 49  | No |
| #AML 6 | Normal | chr15 | 31851193  | 31851193  | OTUD7A  | SNP | Het | T/C | T | C | 339 | 203 | 136 | No |
| #AML 6 | Tumor  | chr16 | 87445363  | 87445363  | ZCCHC14 | SNP | Het | G/A | G | A | 115 | 52  | 63  | No |
| #AML 6 | Normal | chr16 | 87445363  | 87445363  | ZCCHC14 | SNP | Het | G/A | G | A | 136 | 80  | 56  | No |
| #AML 6 | Normal | chr20 | 44512300  | 44512300  | ZSWIM1  | SNP | Het | G/A | G | A | 250 | 164 | 86  | No |
| #AML 6 | Tumor  | chr20 | 50092027  | 50092027  | NFATC2  | SNP | Het | T/G | T | G | 217 | 112 | 105 | No |
| #AML 6 | Normal | chr20 | 50092027  | 50092027  | NFATC2  | SNP | Het | T/G | T | G | 138 | 72  | 66  | No |
| #AML 6 | Tumor  | chr3  | 4185026   | 4185026   | SUMF1   | SNP | Het | G/A | G | A | 281 | 143 | 138 | No |
| #AML 6 | Normal | chr3  | 4185026   | 4185026   | SUMF1   | SNP | Het | G/A | G | A | 234 | 135 | 99  | No |
| #AML 6 | Tumor  | chr5  | 140215301 | 140215301 | PCDHA7  | SNP | Het | G/A | G | A | 44  | 42  | 2   | No |
| #AML 6 | Normal | chr5  | 140229827 | 140229827 | PCDHA7  | SNP | Het | C/T | C | T | 55  | 53  | 2   | No |
| #AML 6 | Tumor  | chr8  | 52733050  | 52733050  | PCMTD1  | SNP | Hom | A/A | T | A | 182 | 0   | 182 | No |
| #AML 6 | Normal | chr8  | 52733050  | 52733050  | PCMTD1  | SNP | Hom | A/A | T | A | 108 | 0   | 108 | No |
| #AML 6 | Tumor  | chr9  | 139617626 | 139617626 | FAM69B  | SNP | Het | G/A | G | A | 55  | 27  | 28  | No |
| #AML 6 | Normal | chr9  | 139617626 | 139617626 | FAM69B  | SNP | Het | G/A | G | A | 44  | 26  | 18  | No |
| #AML 6 | Tumor  | chr9  | 139617662 | 139617662 | FAM69B  | SNP | Het | T/C | T | C | 39  | 0   | 39  | No |
| #AML 6 | Normal | chr9  | 139617662 | 139617662 | FAM69B  | SNP | Hom | C/C | T | C | 29  | 0   | 29  | No |

|        |        |       |           |           |                |     |     |     |   |   |     |     |     |    |
|--------|--------|-------|-----------|-----------|----------------|-----|-----|-----|---|---|-----|-----|-----|----|
| #AML 7 | Normal | chr1  | 89449434  | 89449434  | <i>CCBL2</i>   | SNP | Het | T/C | T | C | 179 | 171 | 8   | No |
| #AML 7 | Tumor  | chr1  | 111783996 | 111783996 | <i>CHI3L2</i>  | SNP | Hom | G/G | A | G | 375 | 0   | 375 | No |
| #AML 7 | Normal | chr1  | 111783996 | 111783996 | <i>CHI3L2</i>  | SNP | Hom | G/G | A | G | 365 | 0   | 365 | No |
| #AML 7 | Tumor  | chr1  | 236906269 | 236906269 | <i>ACTN2</i>   | SNP | Het | G/A | G | A | 590 | 523 | 67  | No |
| #AML 7 | Tumor  | chr11 | 55890152  | 55890152  | <i>OR8H3</i>   | SNP | Het | T/C | T | C | 57  | 55  | 2   | No |
| #AML 7 | Tumor  | chr11 | 60906294  | 60906294  | <i>VPS37C</i>  | SNP | Het | G/A | G | A | 412 | 353 | 59  | No |
| #AML 7 | Tumor  | chr12 | 11214360  | 11214360  | <i>PRH1</i>    | SNP | Het | C/T | C | T | 254 | 165 | 89  | No |
| #AML 7 | Normal | chr12 | 11214360  | 11214360  | <i>PRH1</i>    | SNP | Het | C/T | C | T | 212 | 133 | 79  | No |
| #AML 7 | Tumor  | chr12 | 11214368  | 11214368  | <i>PRH1</i>    | SNP | Het | T/C | T | C | 316 | 300 | 16  | No |
| #AML 7 | Tumor  | chr12 | 11214386  | 11214386  | <i>PRH1</i>    | SNP | Het | T/G | T | G | 315 | 299 | 16  | No |
| #AML 7 | Tumor  | chr12 | 11214392  | 11214392  | <i>PRH1</i>    | SNP | Het | G/A | G | A | 316 | 300 | 16  | No |
| #AML 7 | Tumor  | chr12 | 11214455  | 11214455  | <i>PRH1</i>    | SNP | Het | T/C | T | C | 314 | 298 | 16  | No |
| #AML 7 | Tumor  | chr12 | 11214495  | 11214495  | <i>PRH1</i>    | SNP | Het | T/C | T | C | 294 | 279 | 15  | No |
| #AML 7 | Tumor  | chr16 | 87445411  | 87445411  | <i>ZCCHC14</i> | SNP | Het | G/A | G | A | 152 | 77  | 75  | No |
| #AML 7 | Normal | chr16 | 87445411  | 87445411  | <i>ZCCHC14</i> | SNP | Het | G/A | G | A | 81  | 37  | 44  | No |
| #AML 7 | Tumor  | chr19 | 20003109  | 20003109  | <i>ZNF253</i>  | SNP | Het | A/G | A | G | 217 | 120 | 97  | No |
| #AML 7 | Normal | chr19 | 20003109  | 20003109  | <i>ZNF253</i>  | SNP | Het | A/G | A | G | 228 | 113 | 115 | No |
| #AML 7 | Tumor  | chr5  | 140229827 | 140229827 | <i>PCDHA7</i>  | SNP | Het | C/T | C | T | 36  | 34  | 2   | No |
| #AML 7 | Tumor  | chr8  | 52733050  | 52733050  | <i>PCMTD1</i>  | SNP | Het | T/A | T | A | 130 | 70  | 60  | No |
| #AML 7 | Normal | chr8  | 52733050  | 52733050  | <i>PCMTD1</i>  | SNP | Het | T/A | T | A | 77  | 36  | 41  | No |
| #AML 7 | Tumor  | chr9  | 139617626 | 139617626 | <i>FAM69B</i>  | SNP | Hom | A/A | G | A | 77  | 0   | 77  | No |
| #AML 7 | Normal | chr9  | 139617626 | 139617626 | <i>FAM69B</i>  | SNP | Het | G/A | G | A | 56  | 3   | 53  | No |
| #AML 7 | Tumor  | chr9  | 139617662 | 139617662 | <i>FAM69B</i>  | SNP | Hom | C/C | T | C | 52  | 0   | 52  | No |
| #AML 7 | Normal | chr9  | 139617662 | 139617662 | <i>FAM69B</i>  | SNP | Hom | C/C | T | C | 44  | 0   | 44  | No |
| #AML 7 | Tumor  | chrX  | 48559005  | 48559005  | <i>SUV39H1</i> | SNP | Het | A/G | A | G | 231 | 163 | 68  | No |

A database
