# Supplementary material for: The modular network structure of the mutational landscape of Acute Myeloid Leukemia
Source: PubMed Central journal article supplement (PMC6179200; doi:10.1371/journal.pone.0202926), 2018-10-10
Supplement: pone.0202926.s005.pdf [file pone.0202926.s005.pdf]

**Supplementary Tabala S4. Clinical data of patients from the extended cohort.**

| Characteristics                            | All patients (N) |
|--------------------------------------------|------------------|
| Overall                                    | 100              |
| Gender                                     |                  |
| Male                                       | 60               |
| Female                                     | 40               |
| Cytogenetics                               |                  |
| Normal Kariotype                           | 77               |
| Other                                      | 23               |
| FAB subtype                                |                  |
| M0                                         | 9                |
| M1                                         | 25               |
| M2                                         | 28               |
| M4                                         | 24               |
| M5                                         | 13               |
| M6                                         | 1                |
| MRC Code                                   |                  |
| 3                                          | 77               |
| 4                                          | 11               |
| 5                                          | 1                |
| 9                                          | 2                |
| 10                                         | 3                |
| 11                                         | 6                |
| White blood cell count ( $\times 10^9/L$ ) |                  |
| Median                                     | 23,1             |
| Range                                      | 0,8-324          |
| Platelet count ( $\times 10^9/L$ )         |                  |
| Median                                     | 61               |
| Range                                      | 7-631            |
| Haemoglobin count ( $\times 10^9/L$ )      |                  |
| Median                                     | 9,2              |
| Range                                      | 5,60-15,60       |
| Overall survival (mo)                      |                  |
| Median                                     | 24               |
| Range                                      | 0-126            |
| Death                                      | 71               |
| CR achievement                             | 64               |
| Relapse                                    | 21               |
