# Supplementary material for: The modular network structure of the mutational landscape of Acute Myeloid Leukemia
Source: PubMed Central journal article supplement (PMC6179200; doi:10.1371/journal.pone.0202926), 2018-10-10
Supplement: pone.0202926.s006.pdf [file pone.0202926.s006.pdf]

|        |       |       |      |        |        |         |      |                            |             |       |       |              |          |        |
|--------|-------|-------|------|--------|--------|---------|------|----------------------------|-------------|-------|-------|--------------|----------|--------|
| FAM70B | UZAF1 | HMRNK | CCN2 | INTS12 | NFATC2 | ZCCHC16 | CD22 | NEDD9                      | PIK3R1      | EPH01 | USP9K | USP34        | C12orf51 | OTUD7A |
|        |       |       |      |        |        |         |      | p.Ser387Tyr<br>p.Gln782His | p.Arg358Leu |       |       | p.Glu1246Lys |          |        |

p.Gln157Arg

p.Thr320Ile

p.Arg3096Gln

p.Thr981Met

p.Val51Leu

p.Thr981Met p.Ile1974Val

p.Glu159\_Met160insTyrGlu

p.Ile535Ile

p.Gln157Arg

p.Ala1568Val

p.Trp262Ter

p.Gln602Pro

p.Arg546Ile

p.Lys247Arg

p.Arg497His

p.Thr793Met

p.His1638Arg

p.Ser34Phe

p.Met832Ile  
p.Tyr399Cys

p.Thr981Met

p.Arg409Gln p.Asn430Thr
