# Supplementary material for: The modular network structure of the mutational landscape of Acute Myeloid Leukemia
Source: PubMed Central journal article supplement (PMC6179200; doi:10.1371/journal.pone.0202926), 2018-10-10

S1 Fig.

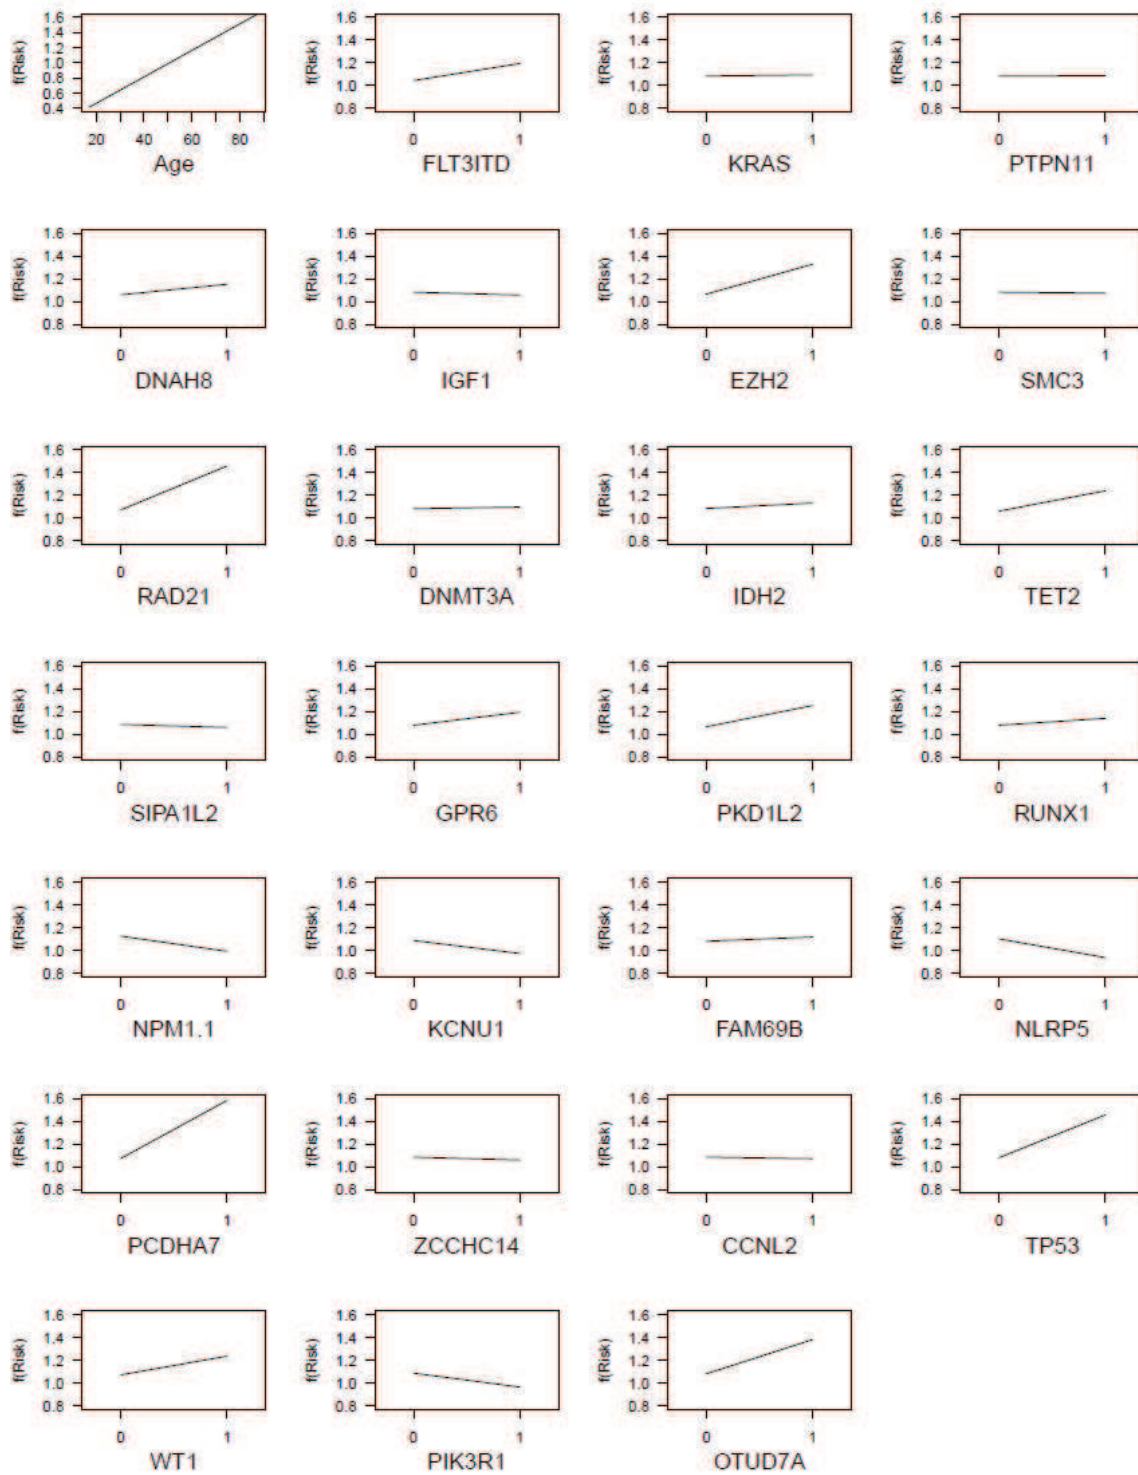

Supplement: pone.0202926.s007.pdf [file pone.0202926.s007.pdf]
